# Supplementary material
Source: PubMed Central journal article supplement (PMC5910841)
Supplement: pnas.201718826SI.pdf [file pnas.201718826SI.pdf]

# Supporting Information

Liao et al. 10.1073/pnas.1718826115

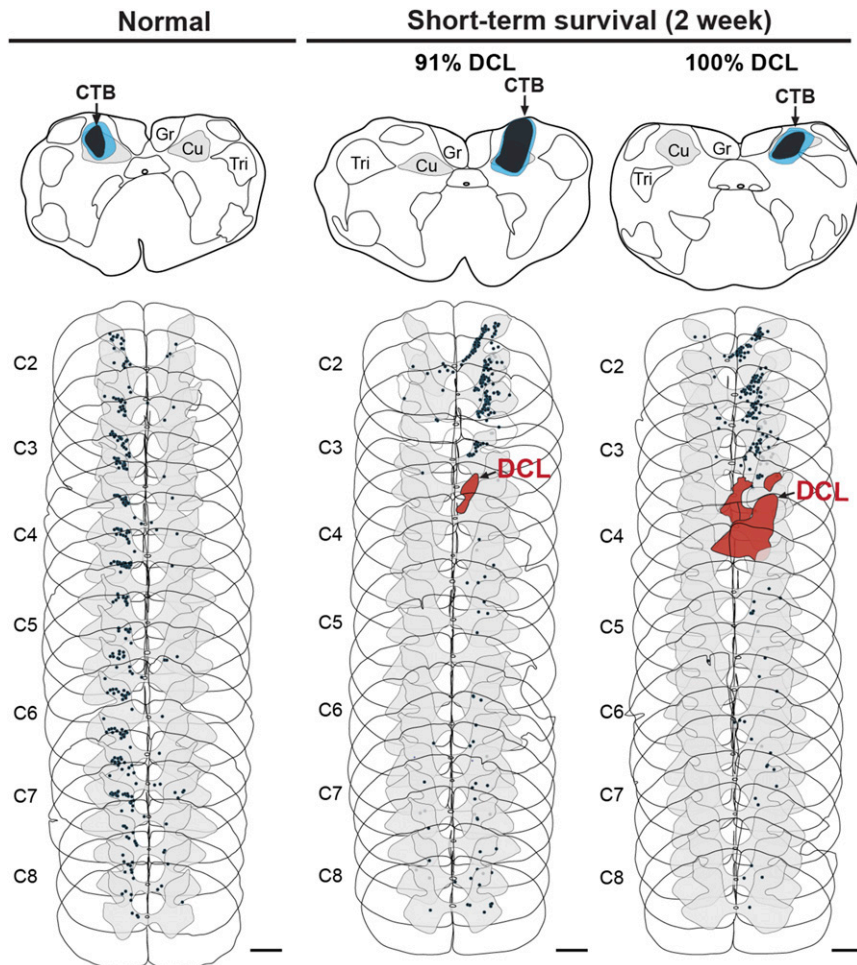

**Fig. S1.** The distributions of labeled neurons (blue dots) in the cervical spinal cord after CTB injection in the hand representation in the Cu in one normal monkey and in two monkeys at 2 wk after DCLs, estimated as incomplete (monkey SM-LM; 91% complete) and complete (monkey SM-RU; 100% complete). DCLs dramatically decreased the numbers of labeled neurons below the lesion in the cervical spinal cord ipsilateral to the lesion in the two monkeys. C2–C8, cervical spinal segments 2–8; Gr, gracile nucleus; Tri, trigeminal nucleus. (Scale bar: 1 mm.)



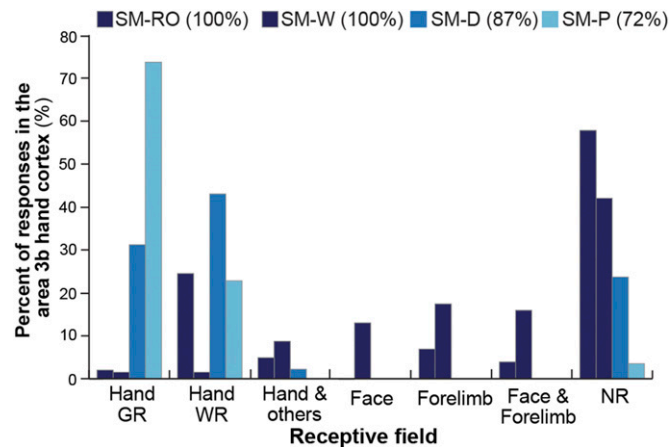

**Fig. S3.** Bar graph showing the percentage of cortical area in the affected hand region of area 3b responsive to touch on the hand, face, and forelimb or large receptive fields involving the hand, face, and/or forelimb ("others") in the four monkeys after prolonged recovery from DCL. GR, good response; NR, no response; WR weak response.

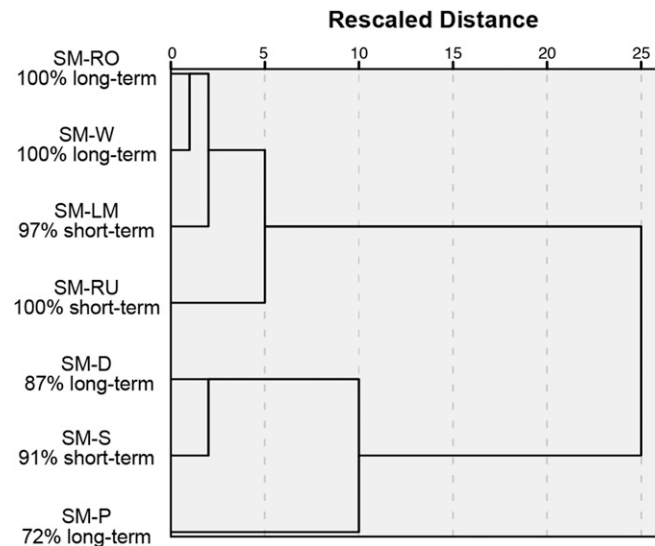

**Fig. S4.** Dendrogram using complete linkage hierarchical clustering of scaled factors (z-scores) showing the merging of the subjects into groups based on the distance or similarity between selected measures. The data used for the clustering analysis were (i) the proportions of labeled cells ipsilateral to and below the lesion, (ii) the extent of DCL, and (iii) the proportions of unresponsive electrode penetrations. The x-axis reflects the squared Euclidean distance between clusters. The y-axis shows the case identity, starting as separate clusters at distance 0. Supporting our categorization into <95% and >95% DCLs, monkey SM-LM (estimated 97% complete, short-term) clustered with cases with estimated 100% complete DCLs, while monkey SM-S (estimated 91% complete, short-term) clustered with cases that had less extensive DCLs. This grouping into categories was used for visualization and summary purposes (e.g., Fig. 3).

**Table S1.** Number of labeled neurons in the ipsilateral cervical spinal cord (C2–C8) from tracer injection in the Cu in monkeys after long-term DCLs

| Location     | Monkey (total <i>n</i> ) |              |              |              |
|--------------|--------------------------|--------------|--------------|--------------|
|              | SM-RO (1,617)            | SM-W (2,092) | SM-D (3,689) | SM-P (3,344) |
| Above lesion | 1,554                    | 1,969        | 2,599        | 1,887        |
| Below lesion | 63                       | 123          | 1,090        | 1,457        |

Cases are listed by greatest to least extent of DCLs, from left to right (100%, 100%, 87%, and 72%).

**Table S2. Numbers of labeled neurons in the entire spinal cord from tracer injection in monkeys after long-term DCLs**

| Location      | Monkey (total <i>n</i> ) |               |             |               |             |               |             |               |
|---------------|--------------------------|---------------|-------------|---------------|-------------|---------------|-------------|---------------|
|               | SM-RO (1856)             |               | SM-W (2848) |               | SM-D (5079) |               | SM-P (4129) |               |
|               | Ipsilateral              | Contralateral | Ipsilateral | Contralateral | Ipsilateral | Contralateral | Ipsilateral | Contralateral |
| Cervical      | 1,617                    | 147           | 2,092       | 241           | 3,689       | 735           | 3,344       | 256           |
| Thoracic      | 43                       | 19            | 275         | 55            | 285         | 139           | 420         | 70            |
| Lumbar sacral | 7                        | 9             | 68          | 81            | 104         | 113           | 19          | 20            |
|               | 8                        | 6             | 16          | 20            | 7           | 7             | 0           | 0             |
| Total         | 1,675                    | 181           | 2,451       | 397           | 4,085       | 994           | 3,783       | 346           |

Cases are listed by greatest to least lesion extent from left to right (100%, 100%, 87%, and 72%).

**Table S3. Number of labeled neurons in the ipsilateral cervical spinal cord from tracer injection in monkeys after short-term DCLs and in normal monkeys**

| Level              | Monkey (total <i>n</i> ) |             |            |            |            |
|--------------------|--------------------------|-------------|------------|------------|------------|
|                    | Short-term DCLs          |             |            | Normal     |            |
|                    | SM-RU (301)              | SM-LM (365) | SM-S (651) | SM-M (900) | SM-Y (533) |
| Above lesion/C2–C4 | 250                      | 304         | 585        | 384        | 215        |
| Below lesion/C5–C8 | 51                       | 61          | 66         | 516        | 318        |

Cases are listed by greatest to least lesion extent from left to right (100%, 97%, and 91%) in the short-term DCL group.

From Liao et al. (2015) (1).

- Liao CC, DiCarlo GE, Gharbawie OA, Qi HX, Kaas JH (2015) Spinal cord neuron inputs to the cuneate nucleus that partially survive dorsal column lesions: A pathway that could contribute to recovery after spinal cord injury. *J Comp Neurol* 523:2138–2160.

**Table S4. Correlations of the amount of second-order spinal cord projection (ratio of the normal projection) and percentage of neural receptive fields in the deafferented area 3b hand cortex**

| Receptive field | Spearman's rho | Lower limit* | Upper limit* | <i>P</i> value |
|-----------------|----------------|--------------|--------------|----------------|
| HandGR          | 0.418          | −0.489       | 0.891        | 0.3505         |
| HandWR          | 0              | −0.753       | 0.753        | 1              |
| Hand and others | −0.577         | −0.927       | 0.311        | 0.1754         |
| Face            | −0.412         | −0.889       | 0.494        | 0.3585         |
| Forelimb        | −0.764         | −0.963       | −0.026       | 0.0455         |
| Others          | −0.764         | −0.963       | −0.026       | 0.0455         |
| Unresponsive    | −0.342         | −0.871       | 0.554        | 0.4523         |

HandGR, hand good response; HandWR, hand weak response.

\*Lower and upper limits of 95% confidence intervals.
